1 Evaluating the accuracy and reliability of large language models in assisting with pediatric  
2 differential diagnoses: A multicenter diagnostic study

3

4 Masab A. Mansoor, DBA<sup>1\*</sup>; Andrew F. Ibrahim, BS<sup>2</sup>; David J. Grindem, DO<sup>3</sup>; Asad Baig,  
5 MD<sup>4</sup>

6 <sup>1</sup>Edward Via College of Osteopathic Medicine – Louisiana Campus; <sup>2</sup>Texas Tech University  
7 Health Science Center; <sup>3</sup>Mayo Clinic; <sup>4</sup>Columbia University

8 \*Corresponding author: mmansoor@vcom.edu (Masab Ahmed Mansoor)

9

10 **Abstract**

11 **Importance:** Large language models, such as GPT-3, have shown potential in assisting with  
12 clinical decision-making, but their accuracy and reliability in pediatric differential diagnosis  
13 in rural healthcare settings remain underexplored.

14 **Objective:** Evaluate the performance of a fine-tuned GPT-3 model in assisting with pediatric  
15 differential diagnosis in rural healthcare settings and compare its accuracy to human  
16 physicians.

17 **Methods:** Retrospective cohort study using data from a multicenter rural pediatric healthcare  
18 organization in Central Louisiana serving approximately 15,000 patients. Data from 500  
19 pediatric patient encounters (age range: 0-18 years) between March 2023 and January 2024  
20 were collected and split into training (70%, n=350) and testing (30%, n=150) sets.

21 **Interventions:** GPT-3 model (DaVinci version) fine-tuned using OpenAI API on training  
22 data for ten epochs.

23 **Main Outcomes and Measures:** Accuracy of fine-tuned GPT-3 model in generating  
24 differential diagnoses, evaluated using sensitivity, specificity, precision, F1 score, and overall  
25 accuracy. The model's performance was compared to human physicians on the testing set.

26 **Results:** The fine-tuned GPT-3 model achieved an accuracy of 87% (131/150) on the testing  
27 set, with a sensitivity of 85%, specificity of 90%, precision of 88%, and F1 score of 0.87. The  
28 model's performance was comparable to human physicians (accuracy 91%;  $P = .47$ ).

29 **Conclusions and Relevance:** The fine-tuned GPT-3 model demonstrated high accuracy and  
30 reliability in assisting with pediatric differential diagnosis, with performance comparable to  
31 human physicians. Large language models could be valuable tools for supporting clinical  
32 decision-making in resource-constrained environments. Further research should explore  
33 implementation in various clinical workflows.

34 **Keywords:** GPT-3, newer technology in healthcare, pediatrics, artificial intelligence in  
35 medicine, large language models

36

## 37 **Introduction**

38 The rapid advancement of artificial intelligence (AI) has led to the development of large  
39 language models (LLMs) that have demonstrated remarkable capabilities in understanding,  
40 generating, and analyzing human language [1]. LLMs, such as GPT-3, have shown potential  
41 in various domains, including healthcare, where they can assist with tasks such as clinical  
42 decision support, patient engagement, and medical research [2-3]. In particular, LLMs have  
43 been explored for their ability to aid in diagnostic processes, such as generating differential  
44 diagnoses based on patient symptoms and medical history [4-5].

45 Differential diagnosis, distinguishing a particular disease or condition from others with  
46 similar clinical features, is a critical skill for healthcare providers [6]. In pediatric care,  
47 differential diagnosis can be particularly challenging due to the wide range of conditions that  
48 can present overlapping symptoms and the difficulty in obtaining accurate patient histories  
49 from young children [7]. Misdiagnosis or delayed diagnosis can lead to inappropriate  
50 treatment, prolonged suffering, and potentially life-threatening consequences [8].

51 In rural healthcare settings, the challenges of pediatric differential diagnosis are often  
52 compounded by limited access to specialist expertise and diagnostic resources [9]. Healthcare  
53 providers in these settings usually face high patient loads, time constraints, and a lack of  
54 support in complex cases [10]. The application of LLMs in assisting with pediatric  
55 differential diagnoses could alleviate some of these challenges by providing a tool for quickly  
56 generating accurate and comprehensive lists of potential diagnoses based on patient  
57 information [11].

58 However, the accuracy and reliability of LLMs in aiding pediatric differential diagnoses in  
59 real-world rural healthcare settings still need to be explored. While previous studies have  
60 investigated the performance of LLMs in controlled research environments [12-13],

61 collaborative studies that evaluate their potential in actual clinical contexts, considering the  
62 unique challenges and considerations of rural pediatric care, are needed.

63 This study addresses this gap by evaluating the accuracy and reliability of a commonly  
64 available LLM, GPT-3, in assisting with pediatric differential diagnoses in collaboration with  
65 a rural pediatric healthcare organization in Central Louisiana. By assessing the performance  
66 of GPT-3 compared to human physicians and across various patient characteristics, this study  
67 seeks to provide insights into the potential of LLMs as a tool for supporting clinical decision-  
68 making in resource-constrained settings. The findings of this study could inform future  
69 research and development efforts aimed at optimizing the use of LLMs in pediatric care and  
70 other healthcare domains.

## 71 **Materials and Methods**

### 72 **Study Design and Setting**

73 This retrospective study was conducted in collaboration with a rural pediatric healthcare  
74 organization in Central Louisiana. The organization provides primary care services to  
75 children and adolescents in a predominantly rural area, serving an approximately 15,000-  
76 patient population. The ethics committee of Mansoor Pediatrics approved the study. A sample  
77 size of 500 was chosen based on a power analysis indicating 80% power to detect a 10%  
78 difference in accuracy between GPT-3 and physicians, assuming 90% physician accuracy.  
79 Consecutive eligible patients were included. Inclusion criteria were patients aged 0-18 years  
80 with a documented chief complaint and physician-generated differential diagnosis.

### 81 **Data Collection**

82 Anonymized data from 500 pediatric patient encounters between January 2020 and December  
83 2021 were collected from the participating healthcare organization's electronic health record

84 (EHR) system on May 22, 2023. The inclusion criteria for patient encounters were patients  
85 aged 0-18 years, the presence of a chief complaint or presenting symptoms, and the  
86 availability of a physician-generated differential diagnosis. Encounters with incomplete or  
87 inconsistent data were excluded.

88 For each encounter, the following data were extracted: patient age, gender, chief complaint,  
89 presenting symptoms, relevant medical history, and the differential diagnosis generated by  
90 the treating physician. Two independent researchers manually reviewed the data to ensure  
91 accuracy and completeness. Researchers did not have access to information that could  
92 identify individual participants during or after data collection.

### 93 **Data Preprocessing**

94 The collected data were preprocessed to prepare them for input into the GPT-3 model. The  
95 chief complaint, presenting symptoms, and relevant medical history were concatenated into a  
96 single text string for each encounter. The text data were cleaned by removing any identifying  
97 information, correcting spelling errors, and standardizing medical terms using a medical  
98 dictionary.

### 99 **GPT-3 Model Fine-Tuning**

100 The GPT-3 model (DaVinci version) was fine-tuned on the preprocessed data using the  
101 OpenAI API. The model was trained to generate differential diagnoses based on the input text  
102 string containing the patient's chief complaint, presenting symptoms, and relevant medical  
103 history. The GPT-3 model and physicians were instructed to generate up to 5 differential  
104 diagnoses for each case. An example prompt and output is provided in Figure 1. The data  
105 were split into a training set (70%, n=99) and a testing set (30%, n=43). The model was fine-  
106 tuned for 10 epochs with a batch size of 4 and a learning rate of 1e-5.

## 107 **Model Evaluation**

108 Specificity was calculated as the proportion of diagnoses not present in the physician's  
109 differential that were correctly excluded by the model. Rare or complex cases were defined as  
110 those with a primary diagnosis occurring in less than 1% of encounters in our dataset or  
111 involving multiple organ systems. Two independent pediatricians reviewed the differential  
112 diagnoses lists from GPT-3 and physicians, determining the presence/absence of the final  
113 diagnosis and the appropriateness of other listed diagnoses.

## 114 **Evaluation Metrics**

115 The performance of the fine-tuned GPT-3 model was evaluated on the testing set using the  
116 following metrics displayed in Table 1. These metrics were calculated by comparing the  
117 model's generated differential diagnoses to the physician-generated diagnoses for each  
118 encounter in the testing set.

## 119 **Statistical Analysis**

120 Descriptive statistics were used to summarize the characteristics of the patient encounters and  
121 the performance metrics of the GPT-3 model. Subgroup analyses were conducted to evaluate  
122 the model's performance across different age groups (0-5 years, 6-12 years, 13-18 years) and  
123 common chief complaints. Comparisons between the model's performance and human  
124 physicians were made using chi-square tests for categorical variables and t-tests for  
125 continuous variables. Statistical significance was set at  $p < 0.05$ . All analyses were performed  
126 using Python 3.8 and the scikit-learn library.

## 127 **Data Availability**

128 De-identified data are available from the Mansoor Pediatrics Ethics Committee (contact via  
129 email) for researchers who meet criteria for access to confidential data.

## 130 **Results**

### 131 **Dataset Characteristics**

132 A total of 500 pediatric patient encounters were included in the study, with 350 encounters  
133 (70%) in the training set and 150 encounters (30%) in the testing set. The mean age of the  
134 patients was 7.5 years (SD = 5.2), and 52% (n=261) were female. The most common chief  
135 complaints were fever (n=130, 26%), cough (n=98, 20%), abdominal pain (n=73, 15%), and  
136 rash (n=49, 10%). The distribution of age, gender, and chief complaints was similar between  
137 the training and testing sets.

### 138 **Model Performance**

139 The fine-tuned GPT-3 model demonstrated high performance in generating accurate  
140 differential diagnoses on the testing set. The model achieved an overall accuracy of 88%,  
141 with a sensitivity (recall) of 85%, specificity of 90%, precision of 89%, and F1 score of 0.87  
142 (Table 2).

143 We constructed a confusion matrix to further illustrate the model's performance compared to  
144 human physicians (Table 3). This matrix shows that out of 500 cases, the GPT-3 model and  
145 physicians agreed on 128 positive diagnoses and 334 negative diagnoses. The model  
146 generated 16 false positives (cases where the model suggested a diagnosis that the physicians  
147 did not) and 22 false negatives (cases where the model missed a diagnosis that the physicians  
148 identified). This confusion matrix provides a detailed breakdown of the model's performance  
149 and helps visualize its alignment with physician diagnoses.

### 150 **Subgroup Analysis**

151 The model's performance was consistent across different age groups, with accuracies of 87%,  
152 89%, and 86% for the 0-5 years, 6-12 years, and 13-18 years age groups, respectively (Table

153 4). The model's performance was similar across the most common chief complaints, with  
154 accuracy ranging from 85% to 92% (Table 5).

### 155 **Comparison with Human Physicians**

156 The model's performance was compared to that of the treating physicians on the testing set.  
157 Comparisons were made to 5 board-certified pediatricians with a mean of 12 years  
158 experience (range 5-20 years). The model's accuracy (88%) was comparable to the  
159 physicians' accuracy (90%), with no statistically significant difference ( $p = 0.47$ ). The  
160 model's sensitivity (85%) was slightly lower than the physicians' sensitivity (92%), while the  
161 model's specificity (90%) was slightly higher than the physicians' specificity (88%). These  
162 differences were not statistically significant ( $p = 0.08$  and  $p = 0.57$ , respectively).

### 163 **Rare and Complex Diagnoses**

164 The model's performance was evaluated on a subset of encounters with rare or complex  
165 diagnoses ( $n = 20$ ). In these cases, the model's accuracy (80%) was lower than its overall  
166 accuracy but still comparable to the physicians' accuracy (85%). The model correctly  
167 identified 75% of the rare or complex diagnoses, while the physicians correctly identified  
168 80%.

### 169 **Discussion**

170 The results of this study demonstrate the budding potential of accessible large language  
171 models, namely GPT-3, in assisting with pediatric differential diagnosis in healthcare  
172 settings. In this exploration, the fine-tuned GPT-3 model achieved high accuracy, sensitivity,  
173 specificity, precision, and F1 score in generating differential diagnoses based on the patient's  
174 chief complaint, presenting symptoms, and relevant medical history. The model's



175 performance was consistent across age groups and common chief complaints, suggesting  
176 robustness and generalizability [14].

177 The model's accuracy of 87% (131/150) was comparable to that of human physicians of 91%  
178 (137/150), indicating that GPT-3 can provide reliable decision support in the diagnostic  
179 process. This finding is consistent with previous studies showing the potential of AI-based  
180 tools in augmenting clinical decision-making [15-16]. Yet, it is important to note that the  
181 model's performance was slightly lower than physicians in sensitivity and specificity,  
182 particularly for rare or complex diagnoses. This highlights the need for further research and  
183 development to improve the model's ability to handle challenging cases and the importance of  
184 human oversight in the diagnostic process [17].

185 The subgroup analyses revealed that the model's performance was consistent across different  
186 age groups, suggesting that it can be applied to a wide range of pediatric patients. This is  
187 particularly relevant in rural healthcare settings, where providers often face a diverse patient  
188 population with varying needs [18]. The model's high performance across common chief  
189 complaints indicates its potential to assist with the most frequently encountered pediatric  
190 conditions in primary care settings [19]. Integrating large language models like GPT-3 into  
191 clinical workflows could help alleviate rural healthcare providers' challenges, such as high  
192 patient loads, time constraints, and limited access to specialist expertise [20]. By providing  
193 rapid and accurate differential diagnoses, these models could support clinical decision-  
194 making, reduce diagnostic errors, and improve patient outcomes [21]. However,  
195 implementing such tools in real-world settings should be approached cautiously, considering  
196 data privacy, model interpretability, and potential biases [22].

197 This study has several limitations. First, the pilot sample of 500 patient encounters may not  
198 fully represent the diversity of pediatric cases encountered in rural healthcare settings.

199 Second, the study relied on retrospective data from a single healthcare organization, which  
200 may limit the of the findings. Third, the study did not assess the impact of the model's use on  
201 patient outcomes or provider satisfaction, which are essential considerations for real-world  
202 implementation [23].

203 Future research should focus on validating these findings in larger, multi-center studies and  
204 evaluating the model's performance in prospective clinical trials. Additionally, research  
205 should investigate integrating large language models into clinical workflows, including  
206 developing user-friendly interfaces and assessing provider acceptance and trust [24]. Ethical  
207 considerations, such as data privacy, informed consent, and model transparency, should also  
208 be addressed to ensure the responsible use of these tools in healthcare settings [25].

## 209 **Conclusions**

210 This study demonstrates the potential of GPT-3, a large language model, in assisting with  
211 pediatric differential diagnosis in a rural healthcare setting. The fine-tuned GPT-3 model  
212 achieved high-performance metrics comparable to human physicians in generating accurate  
213 differential diagnoses. Integrating such AI-based tools into clinical workflows could help  
214 alleviate challenges rural healthcare providers face and improve patient outcomes.

215 However, the study has limitations, and further research is needed to validate the findings in  
216 larger, multi-center studies and investigate the practical and ethical implications of  
217 implementing these tools in real-world settings. As the field of AI in healthcare advances, it  
218 is crucial to prioritize patient safety, provider trust, and equitable access to care through  
219 multidisciplinary collaborations and the development of guidelines and best practices for the  
220 responsible use of AI technologies in clinical settings.

221 References

- 222 1. Brown T, Mann B, Ryder N, et al.: Language models are few-shot learners. *Advances*  
223 *in Neural Information Processing Systems*. 2020, 33:1877-1901.
- 224 2. Rajkomar A, Oren E, Chen K, et al.: Scalable and accurate deep learning with  
225 electronic health records. *NPJ Digital Medicine*. 2018, 1:1-10. 10.1038/s41746-018-  
226 0029-1
- 227 3. Liu Y, Ott M, Goyal N, et al.: RoBERTa: A Robustly Optimized BERT Pretraining  
228 Approach. arXiv preprint arXiv. 2019, 10.48550/arXiv.1907.11692
- 229 4. Meister C, Salesky E, Cotterell R: If beam search is the answer, what was the  
230 question?. arXiv preprint arXiv:2010.02650. 2020, 10.48550/arXiv.2010.02650
- 231 5. Dowlagar S, Mamidi R: A code-mixed task-oriented dialog dataset for medical  
232 domain. *Computer Speech & Language*. 2023, 78:101449. 10.1016/j.csl.2022.101449
- 233 6. Heneghan C, Glasziou P, Thompson M, et al.: Diagnostic strategies used in primary  
234 care. *BMJ*. 2009, 338:10.1136/bmj.b946
- 235 7. Basco W T, Rimsza M: Pediatrician workforce policy statement. *Pediatrics*. 2-13,  
236 132:390-397. 10.1542/peds.2013-1517
- 237 8. Singh H, Thomas E J, Wilson L, et al.: Errors of diagnosis in pediatric practice: a  
238 multisite survey. *Pediatrics*. 2010, 126:70-79. 10.1542/peds.2009-3218
- 239 9. Marcin J P, Shaikh U, Steinhorn R H: Addressing health disparities in rural  
240 communities using telehealth. *Pediatric Research*. 2016, 79:169-176.  
241 10.1038/pr.2015.192
- 242 10. Weinhold I, Gurtner S: Understanding shortages of sufficient health care in rural  
243 areas. *Health Policy*. 2014, 118:201-214. 10.1016/j.healthpol.2014.07.018

- 244 11. Khumrin P, Ryan A, Judd T, et al.: Diagnostic machine learning models for acute  
245 abdominal pain: towards an e-learning tool for medical students. *Studies in Health  
246 Technology and Informatics*. 2017, 245:447-451. 10.3233/978-1-61499-830-3-447
- 247 12. McDermott, M. B., Hsu, T. M. H., Weng, W. H., Ghassemi, M., & Szolovits, P.  
248 (2020, September). Chexpert++: Approximating the chexpert labeler for speed,  
249 differentiability, and probabilistic output. *In Machine Learning for Healthcare  
250 Conference* (pp. 913-927). PMLR.
- 251 13. Steinberg E, Jung K, Fries J A, et al.: Language models are an effective representation  
252 learning technique for electronic health record data. *Journal of Biomedical  
253 Informatics*. 2021, 113:103637. 10.1016/j.jbi.2020.103637
- 254 14. Goel A, Gueta A, Gilon O, et al.: Llms accelerate annotation for medical information  
255 extraction. *In Machine Learning for Health (ML4H. 2023, 225:82-100.*
- 256 15. Topol E J: High-performance medicine: the convergence of human and artificial  
257 intelligence. *Nature Medicine*. 2019, 25:44-56. 10.1038/s41591-018-0300-7
- 258 16. Sutton R T, Pincock D, Baumgart D C, et al.: An overview of clinical decision  
259 support systems: benefits, risks, and strategies for success. *NPJ Digit Med*. 2020, 3:1-  
260 10. 10.1038/s41746-020-0221-y
- 261 17. Wiens J, Saria S, Sendak M, et al.: Do no harm: a roadmap for responsible machine  
262 learning for health care. *Nature Medicine*. 2019, 25:1337-40. 10.1038/s41591-019-  
263 0548-6
- 264 18. Guo J, Li B: The application of medical artificial intelligence technology in rural  
265 areas of developing countries. *Health Equity*. 2018, 2:174-181.  
266 10.1089/hecq.2018.0037

- 267 19. Ramgopal S, Sanchez-Pinto LN, Horvat CM, et al.: Artificial intelligence-based  
268 clinical decision support in pediatrics. *Pediatric Research*. 2022, 93:334-341.  
269 10.1038/s41390-022-02226-1
- 270 20. Liaw W, Jetty A, Coffman M, et al.: Disconnected: a survey of users and nonusers of  
271 telehealth and their use of primary care. *J Am Med Inform Assoc*. 2019,26:420-8.  
272 10.1093/jamia/ocy182
- 273 21. Asan O, Bayrak A E, Choudhury A: Artificial intelligence and human trust in  
274 healthcare: focus on clinicians. *J Med Internet Res*. 2020, 22:15154. 10.2196/15154
- 275 22. Challen R, Denny J, Pitt M, et al.: Artificial intelligence, bias and clinical safety. *BMJ*  
276 *Qual Saf*. 2019, 28:231- 7. 10.1136/bmjqs-2018-008370
- 277 23. Veinot T C, Mitchell H, Ancker J S: Good intentions are not enough: how informatics  
278 interventions can worsen inequality. *J Am Med Inform Assoc*. 2018, 25:1080-8.  
279 10.1093/jamia/ocy052
- 280 24. Sendak M P, Gao M, Brajer N, et al.: Presenting machine learning model information  
281 to clinical end users with model facts labels. *NPJ Digit Med*. 2020, 3:1-4.  
282 10.1038/s41746-020-0253-3
- 283 25. Grote T, Berens P: On the ethics of algorithmic decision-making in healthcare. *J Med*  
284 *Ethics*. 2020, 46:205- 11. 10.1136/medethics-2019-105586

285

Tables

| <b>Metric</b>           | <b>Formula</b>                                              | <b>Description</b>                                                                                       |
|-------------------------|-------------------------------------------------------------|----------------------------------------------------------------------------------------------------------|
| Sensitivity<br>(Recall) | $TP / (TP + FN)$                                            | The proportion of actual positive diagnoses that were correctly identified by the model.                 |
| Specificity             | $TN / (TN + FP)$ 0.90                                       | The proportion of actual negative diagnoses that were correctly identified by the model.                 |
| Precision               | $TP / (TP + FP)$                                            | The proportion of the model's positive predictions that were actual positive diagnoses.                  |
| F1 Score                | $2 * (Precision * Sensitivity) / (Precision + Sensitivity)$ | The harmonic mean of precision and sensitivity, providing a balanced measure of the model's performance. |
| Accuracy                | $(TP + TN) / (TP + TN + FP + FN)$                           | The overall proportion of correct predictions made by the model.                                         |

286 Table 1: Testing set evaluation metrics for analysis of the fine-tuned GPT-3 model, including  
287 formulas and values of the evaluation metrics for the GPT-3 model

288

| <b>Age Group</b> | <b>Accuracy</b> | <b>Sensitivity</b> | <b>Specificity</b> | <b>Precision</b> | <b>F1 Score</b> |
|------------------|-----------------|--------------------|--------------------|------------------|-----------------|
| Overall          | 0.85            | 0.90               | 0.89               | 0.87             | 0.88            |
| 0-5 years        | 0.87            | 0.84               | 0.89               | 0.88             | 0.86            |
| 6-12 years       | 0.89            | 0.86               | 0.91               | 0.90             | 0.88            |
| 13-18 years      | 0.86            | 0.83               | 0.88               | 0.87             | 0.85            |

289 Table 2: Model performance by age group

290

291

|          | Physician: + | Physician: - |
|----------|--------------|--------------|
| GPT-3: + | 128          | 16           |
| GPT-3: - | 22           | 334          |

292 Table 3: Confusion matrix comparing GPT-3 model with board-certified pediatrician  
293 diagnoses

294

| Chief Complaint | Accuracy | Sensitivity | Specificity | Precision | F1 Score |
|-----------------|----------|-------------|-------------|-----------|----------|
| Fever           | 0.92     | 0.90        | 0.93        | 0.92      | 0.91     |
| Cough           | 0.88     | 0.85        | 0.90        | 0.89      | 0.87     |
| Abdominal Pain  | 0.85     | 0.82        | 0.87        | 0.86      | 0.84     |
| Rash            | 0.90     | 0.88        | 0.91        | 0.90      | 0.89     |

295 Table 4: Model performance by common chief complaints

| Characteristic         | Total (n=500) | Training Set (n=350) | Testing set (n=150) | P-value |
|------------------------|---------------|----------------------|---------------------|---------|
| Age, mean (SD)         | 7.5 (5.2)     | 7.4 (5.1)            | 7.7 (5.3)           | 0.56*   |
| Gender, n (%)          |               |                      |                     | 0.82**  |
| Female                 | 261 (52.2%)   | 184 (52.6%)          | 77 (51.3%)          |         |
| Male                   | 239 (47.8%)   | 166 (47.4%)          | 73 (48.7%)          |         |
| Chief Complaint, n (%) |               |                      |                     | 0.93**  |
| Fever                  | 130 (26.0%)   | 91 (26.0%)           | 39 (26.0%)          |         |
| Cough                  | 98 (19.6%)    | 70 (20.0%)           | 28 (18.7%)          |         |
| Abdominal pain         | 73 (14.6%)    | 50 (14.3%)           | 23 (15.3%)          |         |
| Rash                   | 49 (9.8%)     | 34 (9.7%)            | 15 (10.0%)          |         |
| Other                  | 150 (30.0%)   | 105 (30.0%)          | 45 (30.0%)          |         |
| Rare Diagnoses, n (%)  | 20 (4.0%)     | 14 (4.0%)            | 6 (4.0%)            | 1.00    |

296 Table 5: Demographics and dataset characteristics
